# Supplementary material
Source: ML conference proceedings conference paper supplement (https://proceedings.neurips.cc/paper_files/paper/2019/hash/a385d7d1e52d89d1a445faa37f5b5307-Abstract.html)
Supplement: Supplementary file 1 [file a385d7d1e52d89d1a445faa37f5b5307-Supplemental.zip]

Archive with 1 entries (1 files):
- ASR_NIPS2019_Appendix.pdf
