# Supplementary material
Source: ML conference proceedings conference paper supplement (https://proceedings.neurips.cc/paper_files/paper/2019/hash/a385d7d1e52d89d1a445faa37f5b5307-Abstract.html)
Supplement: Supplementary file 1 [file a385d7d1e52d89d1a445faa37f5b5307-Supplemental.zip › ASR_NIPS2019_Appendix.pdf]

---

# Multi-object Generation with Amortized Structural Regularization: Appendix

---

## A Algorithm

The training algorithm of ASR is described in Algorithm 1.

## B The reconstruction results

In this section, we illustrate all the inference results of AIR, AIR-pPrior and AIR-ASR on all settings. Results can be found in Fig.1 ~ Fig.5. Some of them are included in the main body.

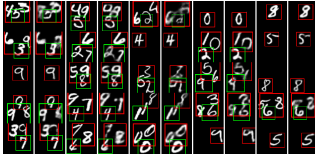

(a) The reconstruction results of AIR-13.

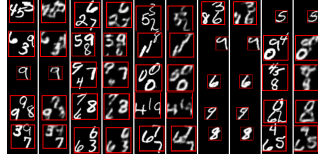

(b) The reconstruction results of AIR-pPrior-13.

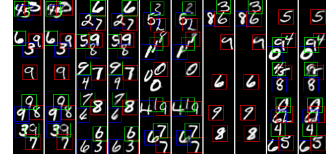

(c) The reconstruction results of AIR-ASR-13.

Figure 1: The reconstruction results of Multi-MNIST on 1 or 3 objects.

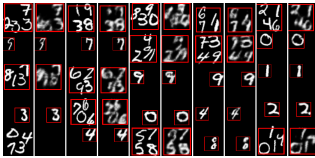

(a) The reconstruction results of AIR-14.

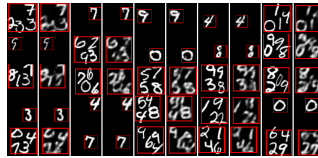

(b) The reconstruction results of AIR-pPrior-14.

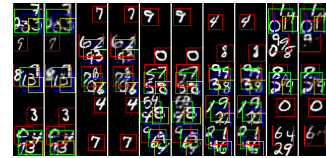

(c) The reconstruction results of AIR-ASR-14.

Figure 2: The reconstruction results of Multi-MNIST on 1 or 4 objects.

---

**Algorithm 1** Stochastic Gradient Ascent Training of ASR
 

---

**Input:** data  $x$ , maximum steps  $K$ , learning rate  $\eta$ , penalty  $R$ .  
 Initialize parameters  $\theta_0$  and  $\phi_0$ , and  $n = 1$ .  
**repeat**  
    $z_{pres}^0 \leftarrow 1, z^0 \leftarrow \mathbf{0}, t \leftarrow 0$   
   **repeat**  
     Update  $t \leftarrow t + 1$   
     Sample  $z_{pres}^t \sim q(z_{pres}^t | z^{<t}, x)$   
     Break if  $z_{pres}^t = 0$   
     Sample  $z^t \sim q(z^t | z^{<t}, x)$   
   **until**  $t = K$   
 Update  $z \leftarrow (z^1, \dots, z^t)$   
 Update  $KL \leftarrow \log \frac{q(z)}{p(z)}, Rec \leftarrow \log p(x|z), r \leftarrow R(q)$   
 Update  $J'(\theta, \phi) \leftarrow Rec - KL - r$   
 Update  $\theta$  and  $\phi$ :  $\theta_n \leftarrow \theta_{n-1} + \eta \frac{\partial J'(\theta, \phi)}{\partial \theta}, \phi_n \leftarrow \phi_{n-1} + \eta \frac{\partial J'(\theta, \phi)}{\partial \phi}$   
 Update  $n$ :  $n \leftarrow n + 1$   
**until** Both  $\theta$  and  $\phi$  converge.

---

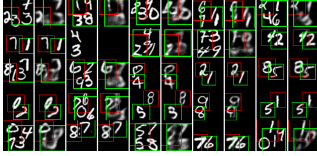

(a) The reconstruction results of AIR-24.

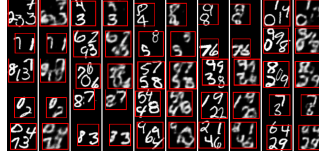

(b) The reconstruction results of AIR-pPrior-24.

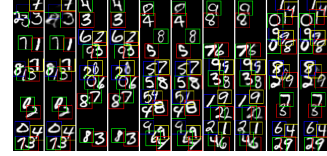

(c) The reconstruction results of AIR-ASR-24.

Figure 3: The reconstruction results of Multi-MNIST on 2 or 4 objects.

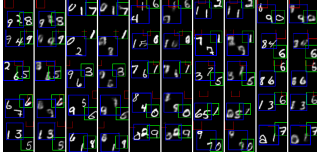

(a) The reconstruction results of AIR-3.

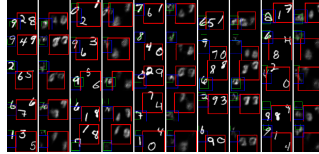

(b) The reconstruction results of AIR-pPrior-3.

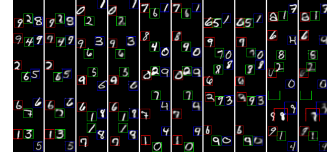

(c) The reconstruction results of AIR-ASR-3.

Figure 4: The reconstruction results of Multi-MNIST 3 objects without overlapping.

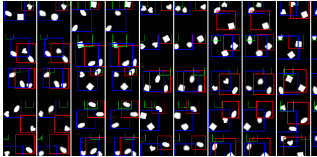

(a) The reconstruction results of AIR-3.

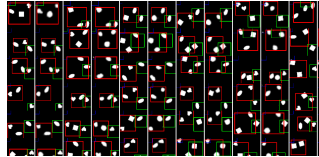

(b) The reconstruction results of AIR-pPrior-3.

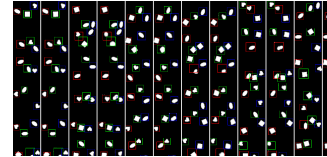

(c) The reconstruction results of AIR-ASR-3.

Figure 5: The reconstruction results of Multi-Sprites 3 objects without overlapping.
